1 Title page

2 Title: Defining Vascular Cognitive Impairment in India—A Descriptive Study of MRI Volumetry vs.  
3 Cognition in ‘Normal’ Adults

4 **Authors:**

5 Uma Sundar;<sup>a</sup> Amita Mukhopadhyay;<sup>b</sup> Sheelakumari Raghavan;<sup>c</sup> Ramshekhar N. Menon;<sup>d</sup>  
6 Chandrasekharan Kesavadas;<sup>e</sup> Nilesh Shah;<sup>f</sup> Balkrishna B. Adsul;<sup>g</sup> Anagha R. Joshi.<sup>h</sup>

7 **Affiliations:**

8 <sup>a</sup> Department of Medicine, Lokmanya Tilak Municipal Medical College and General Hospital  
9 (LTMMC&GH), Sion, Mumbai 400022, Maharashtra, India. Email address:  
10 umasundar2@gmail.com

11 <sup>b</sup> Department of Community Medicine, Dr Chandramma Dayananda Sagar Institute of Medical  
12 Education and Research, Kanakapura 562112, Ramanagara District, Karnataka, India. Email  
13 address: dr.amukho@gmail.com

14 <sup>c</sup> Department of Radiology, Sree Chitra Tirunal Institute for Medical Sciences and Technology  
15 (SCTIMST), Thiruvananthapuram 695011, Kerala, India. Email address:  
16 sheela82nair@gmail.com

17 <sup>d</sup> Department of Neurology, R Madhavan Nayar Centre for Comprehensive Epilepsy Care,  
18 Cognition & Behavioral Neurology, SCTIMST, Thiruvananthapuram. Email address:  
19 rsnmenon@sctimst.ac.in

20 <sup>e</sup> Department of Radiology, SCTIMST, Thiruvananthapuram. Email address:  
21 chandkesav@yahoo.com

22 <sup>f</sup> Department of Psychiatry, LTMMC&GH, Mumbai. Email address: drmilshah@hotmail.com

23 <sup>g</sup> Department of Community Medicine, Hinduhradaysamrat Balasaheb Thackeray Medical  
24 College and Dr. RN Cooper Municipal General Hospital, Juhu, Mumbai 400056, Maharashtra,  
25 India. Email address: adsulbb@gmail.com

26 <sup>h</sup>Department of Radiodiagnosis, LTMMC&GH, Mumbai. Email address:

27 anaghajoshi2405@gmail.com

28

29 **Corresponding author:** Uma Sundar, umasundar2@gmail.com

30

31 Word count (abstract): 250; Word count (text): 3507; References: 50; Tables: 5; Figures: 3.

32

33

34 **Study funding:** Fully funded by the Cognitive Science Research Initiative, Department of Science &

35 Technology, Government of India (Grant ID: CSRI 129/2012).

36 **Ethical approval:** Approved by the Institutional Ethical Committee of Lokmanya Tilak Municipal

37 Medical College and General Hospital, Sion, Mumbai (approval no. 15/2015).

38 **Declarations of interest:** None.

39

40

41

42 .

43

44

45

46

47

48

49

50 **Abstract**

51 **Background:** It is important to establish criteria to define Vascular Cognitive Impairment (VCI) in  
52 India as VCI is an image-based diagnosis and MRI changes resulting from age with prevalent  
53 vascular risk factors may confound MRI interpretation.

54 **Objective:** To establish normative community data for MRI volumetry including white matter  
55 hyperintensity volume (WMHV), correlated with age-stratified cognitive scores and vascular risk  
56 factors in adults  $\geq 40$  years old.

57 **Materials and Methods:** We screened 2651 individuals without known neurological morbidity,  
58 living in Mumbai and nearby rural areas, using validated Marathi translations of Kolkata Cognitive  
59 Battery (KCB) and Geriatric depression score (GDS). We stratified 1961 persons with GDS  $\leq 9$  by  
60 age and cognitive score, and randomly selected ten percent from each subgroup for MRI brain  
61 volumetry. Crude volumes were standardized to reflect percentage of intracranial volume.

62 **Results:** MRI volumetry studies were done in 199 individuals (F/M = 90/109; 73 with BMI  $\geq 25$ ; 44  
63 hypertensives; 29 diabetics; mean cognitive score 76.5). Both grey and white matter volumes  
64 decreased with increasing age. WMHV increased with age and hypertension. Grey matter volume  
65 decreased with increasing WMHV. Positive predictors of cognition included standardized  
66 hippocampal volume (HCV), urban living, education, and BMI, while WMHV and age were  
67 negative predictors. Urban dwellers had higher cognitive scores than rural, and (paradoxically)  
68 smaller HCV.

69 **Conclusions:** Further study is warranted into sociodemographic and biological factors that mutually  
70 influence cognition. Our findings contribute to baseline diagnostic criteria for VCI and could help in  
71 early diagnosis and control of cognitive decline and its key risk factors.

72

73 **Keywords:** Vascular Cognitive Impairment; Cognitive aging; Community-based Study; Cognitive  
74 Testing; Volumetric MRI; White Matter Hyperintensities

75 **Manuscript**

76 **1. Introduction:**

77 India is a highly populated, rapidly ageing nation. The proportion of the Indian population aged over  
78 60 is projected to increase from 8 percent in 2015 to 19 percent in 2050.<sup>1</sup> This transition can  
79 significantly change the Indian morbidity profile, with chronic conditions such as age-related  
80 cognitive decline and comorbidities exacting a formidable toll on the healthcare apparatus.

81 Hypertension and diabetes mellitus, and other cardiovascular risk factors such as smoking, are  
82 known risk factors for cognitive impairment.<sup>2-4</sup> While definitional criteria exist for Alzheimer's  
83 Disease and Vascular Dementia, the same is not true for Vascular Cognitive Impairment (VCI).  
84 There is a lack of clarity on what constitutes VCI. To diagnose VCI clinically, one must have some  
85 degree of clinical cognitive impairment (short of dementia), corroborated by imaging findings of  
86 vascular compromise. The latter would comprise subclinical lacunes, microhemorrhages,  
87 periventricular white matter hyperintensities (WMH), and at times even non-lacunar small embolic  
88 infarcts or bleeds which may not be clinically overt. However, it is well known that some of these  
89 imaging features, especially WMH, can coexist with vascular risk factors (VRFs) such as advancing  
90 age, hypertension, diabetes mellitus, obesity and hyperlipidemia, without overt clinical motor-  
91 sensory deficits. In regions with a high prevalence of undetected or untreated VRF, such as India,  
92 these factors can confound the definition of VCI.

93 Thus, it is necessary to know the baseline values of cognition in different age groups in populations  
94 without prior stroke or dementia in particular regions, in correlation with prevalent VRFs and brain  
95 volumetry, to lay down the 'normative data' specific to that population. Based on this information,  
96 the definition of VCI can be formulated for that population.

97 Hence, our objectives in this study were to determine cognitive scores in an age-stratified 'normal'  
98 population (with no known history of prior clinical strokes or cognitive/behavioral disorders) from  
99 the western part of Maharashtra state in India (both rural and urban areas), to obtain data on VRFs in

100 this population (hypertension, diabetes mellitus, alcohol and tobacco use, body mass index), and  
101 after stratification for cognition in each age bin, to obtain volumetry data on MRI in each stratified  
102 bin as a representative sample of that bin. These baseline parameters would serve as ‘normative data’  
103 of cognitive scores in relation to age, VRFs and brain volumetry (including volume of WMHs, if  
104 noted), and would hence enable a definition of VCI specific to this population, in further studies.

## 105 **2. Materials and Methods:**

106

### 107 **2.1. Study design:**

108 Initially, we translated the Kolkata Cognitive Battery (KCB), a partially modified Hindi cognitive  
109 screening battery used by Ganguli et al.<sup>5</sup> and the Geriatric Depression Score (GDS),<sup>6</sup> into Marathi  
110 and validated both for field use. The KCB is a screening battery consisting of eight tests designed to  
111 test different cognitive domains. Test 1 is for Verbal Fluency, 2 is for Object Naming, 3 is the Mini  
112 Mental State Examination (MMSE), 4 is a Calculation task, 5 tests Immediate Recall, 6 tests Visuo-  
113 Constructional Ability, 7 tests Delayed Recall, and 8 tests Delayed Word Recognition. We used  
114 these instruments to conduct a cross-sectional interview-based survey in several urban and rural  
115 communities in Maharashtra state. We selected the urban study population from Dharavi and other  
116 neighborhoods in Mumbai city. The rural population was chosen from villages that had ongoing  
117 primary health care projects under the community health department of the parent hospital, which  
118 made it feasible to obtain information on the number of households, their family size, and the  
119 number of people over 40 years of age in these areas. We conducted awareness programs about the  
120 study in these communities in the month preceding the survey, through pamphlets and doorstep  
121 campaigning with the help of community health workers.

### 122 **2.2. Data collection:**

123 We invited all persons aged 40 and over, and living in the selected localities, to take part in the  
124 survey. We screened 2752 persons who consented to participate in our study, from March 2015 to  
125 July 2016, and excluded 19 with known intellectual developmental disorder, 31 with possible  
126 previous stroke, 36 with previous psychiatric illness, and 15 persons reported by family to have

127 previously diagnosed dementia or significant memory impairment impeding daily activities. We  
128 interviewed the remaining 2651 participants and collected their sociodemographic data, noted current  
129 daily use of tobacco and alcohol, and measured their height, weight, blood pressure (BP) and fasting  
130 blood glucose. Participants were classified as having hypertension, diabetes mellitus, or other  
131 cardiovascular conditions based on self-report corroborated by medical records and prescriptions.  
132 Participants who had high blood glucose or high BP detected for the first time during examination,  
133 had repeat BP measurements, and fasting and post prandial blood sugar study on a later date, to  
134 confirm the diagnoses in accordance with standard criteria.<sup>7,8</sup>

135 Finally, trained personnel screened the participants using the validated Marathi KCB and GDS tools  
136 and identified 1961 individuals with GDS scores in the normal range ( $GDS \leq 9$ ). We stratified this  
137 group into four subgroups using ten-year age bins (40–49, 50–59, 60–69 and  $\geq 70$ ). Each age group  
138 was further sub-stratified into three cognitive classes based on their KCB score ( $< 80$ , 80–100 and  
139  $> 100$ ). Our final sample for MRI brain imaging ( $n=199$ ) comprised ten percent of the individuals  
140 from each cognitive category within each age bin (12 subgroups in total), selected using computer  
141 generated random numbers.

### 142 **2.3. Volumetry:**

143 We used a Siemens 1.5T MRI system (1.5 T Avanto, Siemens Healthcare, Germany), equipped with  
144 a 32-channel head coil, for MRI scanning. For each participant, we acquired 3D Fluid sensitive T2  
145 space Inversion Recovery (FLAIR) images with repetition time = 6000 ms, echo time = 369 ms, flip  
146 angle =  $90^\circ$ , field of view = 260 mm  $\times$  208 mm  $\times$  174 mm, slice thickness = 1.14 mm, 128 slices per  
147 slab, matrix = 256  $\times$  174, and voxel size = 1.01 mm  $\times$  1.19 mm  $\times$  1.14 mm.

### 148 **2.4. Image processing:**

149 Anatomical images were segmented into grey matter, white matter and cerebrospinal fluid, followed  
150 by spatial normalization of images into stereotactic space using the voxel-based morphometry tool  
151 box in SPM12.<sup>9</sup> The normalized images were smoothed with an 8 mm isotropic Gaussian kernel. The  
152 hippocampal regional volume was extracted by atlas based parcellation using automated anatomical

153 labelling, AAL atlas.<sup>10,11</sup> Automated white matter hyperintensity (WMH) detection was done using  
154 FLAIR images with the lesion segmentation tool box (LST) implemented for SPM12 package.<sup>12,13</sup>  
155 We determined WMH volume using lesion prediction algorithm (LPA SPM12). The processing  
156 methodology is described in detail elsewhere.<sup>14</sup> Post processing was done by an independent team  
157 with prior experience in volumetric studies of Indian populations,<sup>14,15</sup> who were blinded to the  
158 neuropsychological and demographic data.

## 159 **2.5. Statistical methods:**

160 In order to adjust for differences in cranial size, we standardized crude volumetric measurements and  
161 expressed them as a percentage of the total intracranial volume. We analyzed the data using IBM  
162 SPSS Statistics for Windows, Version 20.0. (Armonk, NY: IBM Corp) and JASP.<sup>16</sup> We used the  
163 Mann Whitney U test, the Chi square test, and Welch's unequal variances t-test, to study differences  
164 in sociodemographic and vascular risk factors. We used the Wilcoxon signed rank test to compare  
165 left and right hippocampal volumes, Spearman's rank correlation coefficient for non-parametric  
166 correlations after testing for normality and equality of variances, and Pearson product-moment  
167 correlation to study correlation between variables after adjusting for confounders. Our analysis is  
168 primarily explorative, without a definite outcome variable. Therefore, we did not correct our  
169 obtained P values for multiple comparisons. While reporting results, we have replaced P values with  
170 estimates of effects or association and corresponding 95% confidence intervals. We used rank  
171 biserial correlation coefficients as indicators of effect size for Wilcoxon T and Mann Whitney U  
172 tests, Cramer's V for the Chi square test, and Cohen's d for Welch's t test. We used linear regression  
173 to identify key predictors of volumetric variables and cognition scores. We entered area of residence,  
174 sex, age, education, body mass index (BMI), vascular risk factors, blood glucose and pressure  
175 readings, and brain regional volumes found to be associated in bivariate analysis, as independent  
176 factors for volumetric dependent variables. For cognitive dependent variables, we entered area of  
177 residence, sex, 10-year age groups, educational level, BMI, vascular risk factors, blood glucose and  
178 pressure readings, and standardized brain region volumes as independent factors. Each regression

179 model was checked for multicollinearity, and independent variables with variance inflation factor  
180 (VIF) more than five, or tolerance less than 0.4 were removed from the final models. We have  
181 reported P values as an additional data point for predictor variables in the regression models.  
182 However, we have selected predictors to report based on 95% confidence intervals, in place of P  
183 value.

## 184 **2.6.Glossary of abbreviations:**

185 **Cognitive scores:** KCB = Kolkata Cognitive Battery; KCB Memory = Memory component: Test  
186 scores 5, 7, 8 combined; KCB Executive = Executive component: Test scores 1, 2, 4, 6 combined.

187 **Crude regional brain volumes** (measured in milliliters): GMV = Grey matter volume; WMV =  
188 White matter volume; CSFV = Cerebrospinal fluid volume; LHCV = Left hippocampal volume;  
189 RHCV = Right hippocampal volume ; HCV = Total hippocampal volume; WMHV = White matter  
190 hyperintensity volume; TIV = Total intracranial volume.

191 **Standardized volumes:** All expressed with a % sign suffixed to the corresponding crude volume  
192 abbreviation (such as GMV for grey matter volume and GMV% for standardized grey matter  
193 volume).

194 **Vascular risk factors:** HTN = Hypertension; DM = Diabetes mellitus; IHD = Ischemic heart  
195 disease; BMI = Body mass index; SBP = Systolic BP; DBP = Diastolic BP; PPR = Pulse pressure;  
196 Tobacco = Current daily use of tobacco in any form; Alcohol = Current daily use of alcohol in any  
197 form.

198 **Statistical tests:** MWU = Mann Whitney U test; Wilcoxon T = Wilcoxon signed rank test;  $\rho$  =  
199 Spearman's rank correlation coefficient;  $r$  = Pearson product-moment correlation;  $X^2$  = Chi square;  
200 Welch t = Welch's unequal variances t-test; RC = Rank biserial correlation coefficient; OR = Odds  
201 ratio; 95% CI = 95% confidence intervals.

## 202 **2.7.Standard Protocol Approvals, Registrations, and Patient Consents:**

203 The study design was approved by the Cognitive Science Research Initiative of the Department of  
204 Science & Technology under the Government of India, and ethical approval was granted by the



205 institutional ethical committee of Lokmanya Tilak Municipal Medical College and General Hospital,  
206 Sion, Mumbai. Written informed consent was obtained from all participants in our study.

### 207 **2.8.Data availability:**

208 The master dataset has not been made publicly available as it contains confidential  
209 sociodemographic and clinical data of the participants. Anonymized data will be shared by  
210 reasonable request from any qualified investigator.

## 211 **3. Results:**

212

213 **3.1.Demography:** (Table 1) Our study sample comprised 199 individuals (109 men), three-  
214 fourths of whom (150/199) were between 40 and 59 years of age. A similar proportion  
215 (146/199) were poorly educated, having completed primary school or less. More than one  
216 third were overweight or obese (73/199; 36.9%).

217 **3.2.Cognitive scores:** The mean cognitive score (KCB) of our sample was 76.5 (range 21–125).  
218 The KCB score decreased with increasing age and increased with education. Average KCB  
219 score was notably lower in rural as compared to urban participants (Tables 2, 3).

### 220 **3.3.Volumetry and its associations:**

221 On average, both crude and standardized volumes were smaller for the left hippocampus than  
222 the right (Table 2).

223 3.3.1. **Age:** GMV% and WMV% decreased with increasing age. CSFV and WMHV, both crude  
224 and standardized, increased with age (Table 3, Fig 1).

225 3.3.2. **Sex:** Crude volumes were lower in women than men, but after standardization, this  
226 difference disappeared for all variables save WMV% (higher in women) and CSFV%  
227 (higher in men); WMHV did not show a definite sex difference (Tables 2, 3).

228 3.3.3. **Locality:** Crude and standardized CSFV and HCV were on average larger in rural  
229 participants, while average WMV% was larger in city dwellers (Table 3).

230 3.3.4. **Education:** We did not note a uniform increase or decrease in regional brain volumes  
231 with years of education. However, compared to literate participants, illiterate participants  
232 (n = 29) had smaller mean GMV% (38.5 vs 40.9), higher mean CSFV% (16.3 vs 13.6)  
233 and higher mean WMHV% (0.3 vs 0.1). Illiterate participants also had higher average  
234 CSFV (198.9 vs 166.6 ml) and WMHV (3.8 vs 1.4 ml). Mean crude and standardized  
235 volumes of the right hippocampus were higher in illiterate participants than literate  
236 participants (3.5 vs 3.2 ml; and 0.29 vs 0.26 percent).  
237 Among our literate participants, crude and standardized hippocampal volumes increased  
238 with years of education after controlling for age (Fig 2).

239 3.3.5. **VRFs:** Diastolic BP (DBP) correlated positively with crude and standardized  
240 hippocampal volumes. (Table 4, Fig 3). Correlation controlling for age showed both  
241 Systolic BP (SBP) and pulse pressure (PPR) to correlate positively with WMH volumes  
242 (Table 4).

243 3.3.6. **Cognitive tests:** High scores in Test 8 of the KCB (Delayed Word Recognition) were  
244 correlated with higher hippocampal volumes (Table 4).

#### 245 **3.4. Inter-relationships of regional volumes, controlled for age:**

246 GMV% decreased with increasing WMHV% ( $r = -0.60$ , 95% CI = -0.77 – -0.26; see Fig 1).  
247 CSFV% correlated negatively with both GMV% ( $r = -0.41$ , 95% CI = -0.55 – -0.29) and  
248 WMV% ( $r = -0.49$ , 95% CI = -0.61 – -0.39).

249

#### 250 **3.5. Multivariate analysis:**

251 (Table 5) Urban living, higher education and BMI predicted higher KCB scores, while age  
252 and WMHV% predicted reduced scores. We noted that HCV% and education predicted an  
253 increase in the executive component of the KCB, while BMI predicted increase in the  
254 memory component.

255 Female sex and WMHV were the key predictors of decreased GMV. Post standardization, however,  
256 female sex and hypertension predicted increase in GMV%, while WMHV%, HCV% and age  
257 predicted decrease. For both crude and standardized HCV, education predicted increase in volumes  
258 while urban living predicted decrease. Age, hypertension and SBP predicted increased WMHV.

#### 259 **4. Discussion:**

260  
261 Image-based definition of VCI poses difficulties in India, with its high prevalence of vascular risk  
262 factors, often undetected and untreated, resulting in subclinical vascular findings on the MRI. It is  
263 difficult to determine whether these MRI findings indicate or predict a true VCI, or whether they are  
264 normal for age and associated vascular risk factors. Our study sample consisted of participants who  
265 had no prior history of stroke or clinical dementia, and who, after screening, did not suffer from  
266 depression. Our data would thus enable an evaluation of MRI volumetry in correlation with vascular  
267 risk factors on the one hand, and with age-stratified cognitive scores on the other.  
268 Among our study participants, 22.11% were hypertensive and 14.57% were diabetic. Compared to  
269 rural participants, urban dwellers had a higher percentage of hypertensives (26.2% vs 15.6%) as well  
270 as diabetics (19.7% vs 6.5%;  $X^2 = 6.59$ , Cramer's  $V = 0.18$ ,  $OR = 0.28$ , 95%  $CI_{OR} = 0.10-0.78$ ). This  
271 finding is consistent with the results of a recent nationally representative study, although our urban-  
272 rural differences are wider.<sup>17</sup>

273 The men in our sample had larger mean volumes than women for all brain regions. This can be  
274 explained by difference in cranial size, as standardized volumetric values were similar for both.

275 The average right hippocampal volume (both crude and standardized) was larger than the left among  
276 our participants; similar findings have been reported by researchers from India and abroad.<sup>18-20</sup>

277 Our study shows an increase in hippocampal volume with diastolic BP. Lower DBP has been shown  
278 to be associated with smaller right hippocampal volume in healthy elderly individuals.<sup>21</sup> Lower SBP,  
279 DBP, and mean arterial pressure (MAP) have also been associated with smaller volumes of the  
280 thalamus and putamen, with lower MAP associated with reduced HCV in elderly hypertensives, and

281 it has been suggested that in order to ensure adequate perfusion, the target BP should not be too low  
282 in elderly hypertensives.<sup>22</sup>

283 Our observation of literate participants having a higher mean GMV% than illiterate, is consistent  
284 with reports of volume and metabolism increases in GMV with education in the healthy elderly,<sup>23</sup>  
285 and similar volumetric findings by other researchers.<sup>24</sup>

286 Literature indicates a positive effect of education on hippocampal volume.<sup>25</sup> It has been  
287 demonstrated that education may exert a “dose-dependent” effect on HCV, with age-related decrease  
288 in volumes being steepest among those least educated, and less pronounced in individuals with  
289 higher educational attainment.<sup>26</sup> The results of our bivariate and multivariate analyses (a positive  
290 correlation between HCV and years of education in literate participants, and education predicting  
291 increased HCV in linear regression) provide further evidence of this association. It is possible that, in  
292 our sample of healthy individuals, higher levels of education were able to counteract typical age-  
293 related changes in hippocampal structure. The differential rates of decline may be functionally  
294 significant, resulting in greater retention of the cognitive functions, including declarative memory  
295 performance, which relies on this structure.<sup>27</sup>

296 Hippocampal volume loss has been reported to be specifically associated with decline in delayed  
297 word recall.<sup>28</sup> This is indirectly supported by our observation of the association of hippocampal  
298 volumes with the delayed word recognition score from the KCB.

299 Our illiterate participants were older than literate (mean age 60.7 vs 51.0 years, Welch  $t = 4.47$ ,  
300 Cohen’s  $d = 0.96$ , 95%  $CI_d = 0.50 - 1.41$ ), with higher percentages of alcohol (24.1% vs 0.6%) and  
301 tobacco (27.6% vs 2.9%) users. We also noted a greater proportion of hypertensives (27.6% vs  
302 21.2%) and diabetics (24.1% vs 12.9%) among them. These factors may explain their higher  
303 observed WMHV.

304 Our correlations of WMHV with age, blood pressure, and illiteracy are consistent with literature  
305 establishing age, hypertension, diabetes mellitus, smoking and low educational level as important  
306 risk factors for WMHV.<sup>29-34</sup>

307 Urban versus rural living deserves close examination as a possible determinant of vascular and  
308 neurological morbidity. Our findings are concordant with several Indian and international studies  
309 which have reported association of urban residence with higher cognitive scores.<sup>35-41</sup> Our finding of  
310 lower mean cognitive scores and HCVs in women could not have influenced this association, as  
311 women were equally represented in both subsets (45.5% rural vs 45.1% urban).

312 It is noteworthy that our urban participants had smaller volumes than rural for all volumetric  
313 variables including HCV, despite their higher cognitive scores, and in contradiction to our regression  
314 analysis showing that HCV% predicts high executive function. Urban living alters brain structures,  
315 and has been linked to mental disorders such as schizophrenia.<sup>42,43</sup> Animal models<sup>44,45</sup> and  
316 observational studies of post-traumatic stress disorder patients,<sup>46-48</sup> demonstrate that hippocampal  
317 volume is inversely correlated with exposure to stress. Our urban participants, most of whom were of  
318 a low socio-economic status, would possibly have faced the challenges of underprivileged  
319 backgrounds in their daily lives, which could explain their comparatively smaller HCV. The  
320 discrepancy between volume and cognition in urban dwellers could also be explained by the fact that  
321 age, education, WMHV and BMI, along with urban residence itself, also independently predicted  
322 cognition in this study. Our urban participants were younger than their rural counterparts (mean age  
323 51.41 vs 54.04 years), and had longer years in school (5.32 vs 3.03 Welch  $t = -4.94$ , Cohen's  $d = -$   
324  $0.711$ , 95%  $CI_d = -1.005 - -0.415$ ), smaller mean WMHV (1.52 vs 2.00 ml, 0.13 vs 0.16 %), and  
325 higher mean BMI (24.22 vs. 23.62), all of which could override the effect of smaller HCV. Results  
326 from a study with a participant profile similar to ours (healthy, non-demented, relatively young), do  
327 not indicate any association of smaller HCV with cognitive decline.<sup>49</sup> In another study, it was found  
328 that baseline hippocampal volume, albeit strongly related to baseline cognition, did not predict

329 subsequent cognitive change.<sup>50</sup> Researchers have noted that not all subjects with hippocampal  
330 decline will develop dementia, either due to death preceding symptoms, or because hippocampal  
331 volume decline can be part of healthy ageing.<sup>28</sup> The apparent paradox of smaller HCV with higher  
332 cognition in city dwellers may be explained by the (possibly synergistic) effect of sociodemographic,  
333 behavioral, and environmental factors that compensate for possible stress-induced hippocampal  
334 volume loss.

#### 335 **4.1.Limitations:**

336 Persons aged over 70 years and rural dwellers were inadequately represented in our sample due to  
337 the logistical difficulties of transporting the elderly, and of bringing people over long distances from  
338 rural areas to our urban MRI center. Our study is cross-sectional. While we have established  
339 associations between cognition, brain regional volumes and vascular risk factors, we cannot  
340 comment on causality, or the longitudinal ramifications of observed volumetric differences on  
341 cognitive decline, without follow-up investigation.

#### 342 **5. Conclusions:**

343 Our population-based study of adults without neuropsychiatric morbidity attempts to place cognitive  
344 scores stratified by age and education, within the context of MRI brain volumetry findings. Our  
345 study shows that both GMV and WMV decrease, and WMHV increases, with increasing age. Our  
346 findings also suggest a shrinkage of GMV with increasing WMHV. Urban living, education, and  
347 standardized hippocampal volume predict higher cognitive scores, while WMHV and age predict  
348 lower scores. We noted higher cognitive scores in city dwellers with, paradoxically, smaller  
349 hippocampal volumes. Further study is warranted into sociodemographic and biological factors that  
350 mutually influence cognition. Our findings, particularly the correlation of KCB scores with WMHV  
351 and age, could help guide the definition of VCI in India.

352

353 **Funding information:** This study was fully funded by the Cognitive Science Research Initiative of  
354 the Department of Science & Technology, Government of India.

355 **Acknowledgment:** The authors thank Dr Kuldeep Singh, Radiologist at Gurmeet Imaging, Mumbai,  
356 for his role in obtaining MRI volumetry sequences.

357 **Declarations of interest:** None.

358

## 359 **6. References:**

- 360 1. India Ageing Report - 2017 (Final Version).pdf [online]. Accessed at:  
361 [https://india.unfpa.org/sites/default/files/pub-pdf/India%20Ageing%20Report%20-](https://india.unfpa.org/sites/default/files/pub-pdf/India%20Ageing%20Report%20-%202017%20%28Final%20Version%29.pdf)  
362 [%202017%20%28Final%20Version%29.pdf](https://india.unfpa.org/sites/default/files/pub-pdf/India%20Ageing%20Report%20-%202017%20%28Final%20Version%29.pdf). Accessed December 14, 2019.
- 363 2. Dregan A, Stewart R, Gulliford MC. Cardiovascular risk factors and cognitive decline in adults  
364 aged 50 and over: a population-based cohort study. *Age Ageing*. 2012;42:338–345.
- 365 3. Baumgart M, Snyder HM, Carrillo MC, Fazio S, Kim H, Johns H. Summary of the evidence on  
366 modifiable risk factors for cognitive decline and dementia: A population-based perspective.  
367 *Alzheimers Dement*. 2015;11:718–726.
- 368 4. Kaffashian S, Dugravot A, Elbaz A, et al. Predicting cognitive decline. *Neurology*.  
369 2013;80:1300.
- 370 5. Ganguli M, Chandra V, Gilby JE, et al. Cognitive test performance in a community-based  
371 nondemented elderly sample in rural India: the Indo-U.S. Cross-National Dementia  
372 Epidemiology Study. *Int Psychogeriatr*. 1996;8:507–524.
- 373 6. Yesavage JA, Brink TL, Rose TL, et al. Development and validation of a geriatric depression  
374 screening scale: a preliminary report. *J Psychiatr Res*. 1982;17:37–49.

- 375 7. James PA, Oparil S, Carter BL, et al. 2014 evidence-based guideline for the management of  
376 high blood pressure in adults: report from the panel members appointed to the Eighth Joint  
377 National Committee (JNC 8). *JAMA*. 2014;311:507–520.
- 378 8. Diagnosis and Classification of Diabetes Mellitus. *Diabetes Care*. 2010;33:S62–S69.
- 379 9. SPM - Statistical Parametric Mapping [online]. Wellcome Cent. Hum. Neuroimaging UCL  
380 Queen Sq. Inst. Neurol. Lond. UK. Accessed at: <https://www.fil.ion.ucl.ac.uk/spm/>. Accessed  
381 July 18, 2020.
- 382 10. Tzourio-Mazoyer N, Landeau B, Papathanassiou D, et al. Automated anatomical labeling of  
383 activations in SPM using a macroscopic anatomical parcellation of the MNI MRI single-subject  
384 brain. *NeuroImage*. 2002;15:273–289.
- 385 11. Cycecon - Biomedical Imaging Platform. 2015. Accessed at:  
386 <http://www.cycecon.fr/index.php/en/plateforme-en/freeware>. Accessed July 18, 2020.
- 387 12. Schmidt P, Gaser C, Arsic M, et al. An automated tool for detection of FLAIR-hyperintense  
388 white-matter lesions in Multiple Sclerosis. *NeuroImage*. 2012;59:3774–3783.
- 389 13. Paul Schmidt. LST – Lesion segmentation for SPM [online]. Accessed at: [https://www.applied-](https://www.applied-statistics.de/lst.html)  
390 [statistics.de/lst.html](https://www.applied-statistics.de/lst.html). Accessed July 18, 2020.
- 391 14. Sheelakumari R, Kesavadas C, Lekha VS, Justus S, Sarma PS, Menon R. Structural correlates  
392 of mild cognitive impairment: A clinicovolumetric study. *Neurol India*. 2018;66:370.
- 393 15. Sheelakumari R, Sarma SP, Kesavadas C, et al. Multimodality Neuroimaging in Mild Cognitive  
394 Impairment: A Cross-sectional Comparison Study. *Ann Indian Acad Neurol*. 2018;21:133–139.



- 395 16. JASP Team. JASP (Version 0.13)[Computer software] [online]. 2020. Accessed at: <https://jasp->  
396 [stats.org/](https://jasp-stats.org/). Accessed July 15, 2020.
- 397 17. Geldsetzer P, Manne-Goehler J, Theilmann M, et al. Diabetes and Hypertension in India: A  
398 Nationally Representative Study of 1.3 Million Adults. *JAMA Intern Med.* 2018;178:363–372.
- 399 18. Mohandas A, Bharath R, Prathyusha P, Gupta A. Hippocampal volumetry: Normative data in  
400 the Indian population. *Ann Indian Acad Neurol.* 2014;17:267–271.
- 401 19. Embong MF, Yaacob R, Abdullah MS, Abdulkarim AH, Ghazali AK, Jalaluddin W. MR  
402 Volumetry of Hippocampus in Normal Adult Malay of Age 50 Years Old and Above. *Malays J*  
403 *Med Sci MJMS.* 2013;20:25–31.
- 404 20. Pruessner JC, Li LM, Serles W, et al. Volumetry of Hippocampus and Amygdala with High-  
405 resolution MRI and Three-dimensional Analysis Software: Minimizing the Discrepancies  
406 between Laboratories. *Cereb Cortex.* 2000;10:433–442.
- 407 21. Elcombe EL, Lagopoulos J, Duffy SL, et al. Hippocampal volume in older adults at risk of  
408 cognitive decline: the role of sleep, vascular risk, and depression. *J Alzheimers Dis JAD.*  
409 2015;44:1279–1290.
- 410 22. Foster-Dingley JC, van der Grond J, Moonen JEF, et al. Lower Blood Pressure Is Associated  
411 With Smaller Subcortical Brain Volumes in Older Persons. *Am J Hypertens.* Oxford Academic;  
412 2015;28:1127–1133.
- 413 23. Arenaza-Urquijo EM, Landeau B, La Joie R, et al. Relationships between years of education  
414 and gray matter volume, metabolism and functional connectivity in healthy elders. *NeuroImage.*  
415 2013;83:450–457.

- 416 24. Liu Y, Julkunen V, Paajanen T, et al. Education increases reserve against Alzheimer's  
417 disease—evidence from structural MRI analysis. *Neuroradiology*. 2012;54:929–938.
- 418 25. Nobis L, Manohar SG, Smith SM, et al. Hippocampal volume across age: Nomograms derived  
419 from over 19,700 people in UK Biobank. *NeuroImage Clin*. 2019;23:101904.
- 420 26. Noble KG, Grieve SM, Korgaonkar MS, et al. Hippocampal volume varies with educational  
421 attainment across the life-span. *Front Hum Neurosci* [online serial]. 2012;6. Accessed at:  
422 <https://www.ncbi.nlm.nih.gov/pmc/articles/PMC3494123/>. Accessed July 25, 2020.
- 423 27. Grieve SM, Korgaonkar MS, Clark CR, Williams LM. Regional heterogeneity in limbic  
424 maturational changes: evidence from integrating cortical thickness, volumetric and diffusion  
425 tensor imaging measures. *NeuroImage*. 2011;55:868–879.
- 426 28. den Heijer T, van der Lijn F, Koudstaal PJ, et al. A 10-year follow-up of hippocampal volume  
427 on magnetic resonance imaging in early dementia and cognitive decline. *Brain J Neurol*.  
428 2010;133:1163–1172.
- 429 29. Valdés Hernández M del C, Booth T, Murray C, et al. Brain white matter damage in aging and  
430 cognitive ability in youth and older age. *Neurobiol Aging*. 2013;34:2740–2747.
- 431 30. Breteler MM, van Swieten JC, Bots ML, et al. Cerebral white matter lesions, vascular risk  
432 factors, and cognitive function in a population-based study: the Rotterdam Study. *Neurology*.  
433 United States; 1994;44:1246–1252.
- 434 31. Longstreth WTJ, Manolio TA, Arnold A, et al. Clinical correlates of white matter findings on  
435 cranial magnetic resonance imaging of 3301 elderly people. The Cardiovascular Health Study.  
436 *Stroke*. United States; 1996;27:1274–1282.

- 437 32. Ylikoski A, Erkinjuntti T, Raininko R, Sarna S, Sulkava R, Tilvis R. White matter  
438 hyperintensities on MRI in the neurologically nondiseased elderly. Analysis of cohorts of  
439 consecutive subjects aged 55 to 85 years living at home. *Stroke. United States*; 1995;26:1171–  
440 1177.
- 441 33. Modir R, Gardener H, Wright CB. Blood Pressure and White Matter Hyperintensity Volume -  
442 A Review of the Relationship and Implications for Stroke Prediction and Prevention. *Eur*  
443 *Neurol Rev.* 2012;7:174.
- 444 34. Habes M, Erus G, Toledo JB, et al. White matter hyperintensities and imaging patterns of brain  
445 ageing in the general population. *Brain J Neurol. England*; 2016;139:1164–1179.
- 446 35. Xu H, Ostbye T, Vorderstrasse AA, Dupre M, Wu B. Place of Residence and Cognitive  
447 Function among the Adult Population in India. *Neuroepidemiology.* 2018;50:119–127.
- 448 36. Patel RM, Singh US. Prevalence study of cognitive impairment and its associated  
449 sociodemographic variables using mini-mental status examination among elderly population  
450 residing in field practice areas of a medical college. *Indian J Community Med.* 2018;43:113.
- 451 37. Poddar K, Kant S, Singh A, Singh TB. An epidemiological study of dementia among the  
452 habitants of Eastern Uttar Pradesh, India. *Ann Indian Acad Neurol.* 2011;14:164.
- 453 38. Nadel JL, Ulate D. Incidence and risk factors for cognitive impairment in rural elderly  
454 populations in Costa Rica. *Rev Biol Trop.* 2014;62:869–876.
- 455 39. Nunes B, Silva RD, Cruz VT, Roriz JM, Pais J, Silva MC. Prevalence and pattern of cognitive  
456 impairment in rural and urban populations from Northern Portugal. *BMC Neurol.* 2010;10:42.
- 457 40. Saenz JL, Downer B, Garcia MA, Wong R. Cognition and Context: Rural–Urban Differences in  
458 Cognitive Aging Among Older Mexican Adults. *J Aging Health.* 2018;30:965–986.

- 459 41. Xiang Y, Zare H, Guan C, Gaskin D. The impact of rural-urban community settings on  
460 cognitive decline: results from a nationally-representative sample of seniors in China. *BMC*  
461 *Geriatr.* 2018;18:323.
- 462 42. Besteher B, Gaser C, Spalthoff R, Nenadić I. Associations between urban upbringing and  
463 cortical thickness and gyrification. *J Psychiatr Res.* 2017;95.
- 464 43. Haddad L, Schäfer A, Streit F, et al. Brain Structure Correlates of Urban Upbringing, an  
465 Environmental Risk Factor for Schizophrenia. *Schizophr Bull.* 2014;41.
- 466 44. Ohl F, Michaelis T, Vollmann-Honsdorf GK, Kirschbaum C, Fuchs E. Effect of chronic  
467 psychosocial stress and long-term cortisol treatment on hippocampus-mediated memory and  
468 hippocampal volume: a pilot-study in tree shrews. *Psychoneuroendocrinology.* 2000;25:357–  
469 363.
- 470 45. Lee T, Jarome T, Li S-J, Kim JJ, Helmstetter FJ. Chronic stress selectively reduces  
471 hippocampal volume in rats: a longitudinal magnetic resonance imaging study. *Neuroreport.*  
472 2009;20:1554–1558.
- 473 46. Smith ME. Bilateral hippocampal volume reduction in adults with post-traumatic stress  
474 disorder: a meta-analysis of structural MRI studies. *Hippocampus.* 2005;15:798–807.
- 475 47. Woon FL, Hedges DW. Hippocampal and amygdala volumes in children and adults with  
476 childhood maltreatment-related posttraumatic stress disorder: a meta-analysis. *Hippocampus.*  
477 2008;18:729–736.
- 478 48. Villarreal G, Hamilton DA, Petropoulos H, et al. Reduced hippocampal volume and total white  
479 matter volume in posttraumatic stress disorder. *Biol Psychiatry.* 2002;52:119–125.

480 49. Vibha D, Tiemeier H, Mirza SS, et al. Brain Volumes and Longitudinal Cognitive Change: A  
481 Population-based Study. *Alzheimer Dis Assoc Disord.* 2018;32:43–49.

482 50. Carmichael O, Mungas D, Beckett L, et al. MRI predictors of cognitive change in a diverse and  
483 carefully characterized elderly population. *Neurobiol Aging.* 2012;33:83–95.

484

485

486

487

488

489

490

491

492

493

494

495

496

497

498

499

500

501

502

503

504 **Tables**

505 **Table 1: Socio-demography and Vascular Risk Factors**

| Demographic variables                  |                     | Men   |      | Women |      | Total |      |
|----------------------------------------|---------------------|-------|------|-------|------|-------|------|
|                                        |                     | Count | %    | Count | %    | Count | %    |
| Sample Total <sup>a</sup>              |                     | 109   | 54.8 | 90    | 45.2 | 199   | 100  |
| 10-year age groups                     | 40–49               | 45    | 41.3 | 42    | 46.7 | 87    | 43.7 |
|                                        | 50–59               | 35    | 32.1 | 28    | 31.1 | 63    | 31.7 |
|                                        | 60–69               | 20    | 18.3 | 15    | 16.7 | 35    | 17.6 |
|                                        | 70+                 | 9     | 8.3  | 5     | 5.6  | 14    | 7.0  |
| Educational level (years of schooling) | Illiterate          | 14    | 12.8 | 15    | 16.7 | 29    | 14.6 |
|                                        | Primary (1–5)       | 64    | 58.7 | 53    | 58.9 | 117   | 58.8 |
|                                        | Secondary (6–12)    | 30    | 27.5 | 20    | 22.2 | 50    | 25.1 |
|                                        | Graduate (≥13)      | 1     | 0.9  | 2     | 2.2  | 3     | 1.5  |
| Area of residence                      | Rural               | 42    | 38.5 | 35    | 38.9 | 77    | 38.7 |
|                                        | Urban               | 67    | 61.5 | 55    | 61.1 | 122   | 61.3 |
| Vascular Risk Factors                  | HTN                 | 26    | 23.9 | 18    | 20.0 | 44    | 22.1 |
|                                        | DM                  | 18    | 16.5 | 11    | 12.2 | 29    | 14.6 |
|                                        | IHD <sup>b</sup>    | 2     | 1.8  | 2     | 2.2  | 4     | 2.0  |
|                                        | Tobacco             | 12    | 11.0 | 1     | 1.1  | 13    | 6.5  |
|                                        | Alcohol             | 7     | 6.4  | 1     | 1.1  | 8     | 4.0  |
| BMI <sup>c</sup>                       | Underweight (<18.5) | 7     | 6.4  | 7     | 7.9  | 14    | 7.0  |
|                                        | Overweight (25–30)  | 31    | 28.4 | 25    | 28.1 | 56    | 28.3 |
|                                        | Obese (>30)         | 9     | 8.3  | 8     | 9.0  | 17    | 8.6  |

506 <sup>a</sup> Row percentage for sample total; column percentages for all other variables.

507 <sup>b</sup> IHD = Ischemic heart disease; <sup>c</sup> BMI measurements were available for 89 of 90 women.

508 **Table 2: Descriptive Statistics for MRI Volumetry and Cognitive Scores**

|                                                 | Mean   | Median | SD    | Range  | Minimum | Maximum | Mean<br>(M) | Mean<br>(F) | Mean<br>(R) | Mean<br>(U) |
|-------------------------------------------------|--------|--------|-------|--------|---------|---------|-------------|-------------|-------------|-------------|
| <b>Crude Volumes (ml)</b>                       |        |        |       |        |         |         |             |             |             |             |
| GMV                                             | 487.8  | 489.9  | 73.5  | 582.4  | 161.6   | 744.0   | 515.2       | 454.6       | 493.4       | 484.2       |
| WMV                                             | 545.2  | 545.9  | 73.0  | 605.8  | 214.5   | 820.3   | 568.5       | 517.1       | 546.8       | 544.2       |
| CSFV                                            | 171.3  | 162.2  | 64.2  | 307.7  | 55.4    | 363.2   | 193.5       | 144.3       | 186.5       | 161.6       |
| LHCV <sup>a</sup>                               | 3.1    | 2.8    | 0.9   | 4.4    | 0.9     | 5.3     | 3.3         | 2.9         | 3.5         | 2.9         |
| RHCV                                            | 3.2    | 2.9    | 0.9   | 4.8    | 0.8     | 5.6     | 3.4         | 2.9         | 3.6         | 3.0         |
| HCV                                             | 6.3    | 5.7    | 1.8   | 9.0    | 1.7     | 10.7    | 6.7         | 5.8         | 7.1         | 5.8         |
| WMHV                                            | 1.7    | 0.3    | 4.4   | 39.6   | 0       | 39.6    | 2.4         | 0.9         | 2.0         | 1.5         |
| TIV                                             | 1204.2 | 1218.7 | 141.7 | 1161.9 | 458.1   | 1620.0  | 1277.2      | 1116.0      | 1226.7      | 1190.1      |
| <b>Standardized Volumes (percentage of TIV)</b> |        |        |       |        |         |         |             |             |             |             |
| GMV%                                            | 40.6   | 40.8   | 4.3   | 46.7   | 13.1    | 59.8    | 40.4        | 40.8        | 40.3        | 40.8        |
| WMV%                                            | 45.4   | 45.5   | 4.4   | 44.8   | 21.5    | 66.3    | 44.6        | 46.4        | 44.7        | 45.9        |
| CSFV%                                           | 14.0   | 13.4   | 4.5   | 22.2   | 6.4     | 28.6    | 15.1        | 12.8        | 15.1        | 13.4        |
| LHCV% <sup>b</sup>                              | 0.260  | 0.246  | 0.069 | 0.397  | 0.080   | 0.477   | 0.259       | 0.260       | 0.28        | 0.24        |
| RHCV%                                           | 0.266  | 0.249  | 0.071 | 0.393  | 0.071   | 0.464   | 0.270       | 0.261       | 0.29        | 0.25        |
| HCV%                                            | 0.525  | 0.490  | 0.138 | 0.790  | 0.151   | 0.941   | 0.529       | 0.521       | 0.58        | 0.49        |
| WMHV%                                           | 0.140  | 0.026  | 0.357 | 3.204  | 0       | 3.204   | 0.187       | 0.083       | 0.16        | 0.13        |
| <b>Cognitive Scores</b>                         |        |        |       |        |         |         |             |             |             |             |
| KCB Score                                       | 76.5   | 79     | 21.8  | 104    | 21      | 125     | 78.3        | 74.2        | 65.3        | 83.5        |
| KCB<br>Memory                                   | 23.6   | 24     | 9.1   | 40     | 4       | 44      | 24.4        | 22.6        | 20.9        | 25.3        |

|           |      |    |     |    |   |    |      |      |      |      |
|-----------|------|----|-----|----|---|----|------|------|------|------|
| KCB       | 30.1 | 31 | 9.8 | 48 | 5 | 53 | 31.0 | 29.1 | 25.3 | 33.2 |
| Executive |      |    |     |    |   |    |      |      |      |      |

509 SD = Standard Deviation; M = Male; F = Female; R = Rural; U = Urban.

510 <sup>a</sup> LHCV<RHCV: Wilcoxon T = 6232.5, z = -3.93, RC = -0.33, 95% CI<sub>RC</sub> = -0.46 – -0.17

511 <sup>b</sup> LHCV%<RHCV%: Wilcoxon T = 6315, z = -3.83, RC = -0.32, 95% CI<sub>RC</sub> = -0.46 – -0.17

512 KCB consists of eight tests of different cognitive domains. Test1: Verbal Fluency, Test2: Object

513 Naming, Test3: MMSE, Test4: Calculation, Test5: Immediate Recall, Test6: Visuo-Constructional

514 Ability, Test7: Delayed Recall, Test8: Delayed Word Recognition.

515 KCB(Memory) = Memory component (Test scores 5, 7, 8 combined)

516 KCB(Executive) = Executive component (Test scores 1, 2, 4, 6 combined).

517

518

519

520

521

522

523

524

525

526

527

528

529

530

531



532 **Table 3: Sociodemographic Associations of Volumetry and Cognition**

|                             | Age    |                    | Years of Education |                    | Sex    |       |                | Residence |        |                |
|-----------------------------|--------|--------------------|--------------------|--------------------|--------|-------|----------------|-----------|--------|----------------|
|                             | $\rho$ | 95% CIs for $\rho$ | $\rho$             | 95% CIs for $\rho$ | MWU    | RC    | 95% CIs for RC | MWU       | RC     | 95% CIs for RC |
| <b>Crude Volumes</b>        |        |                    |                    |                    |        |       |                |           |        |                |
| GMV                         | -0.14  | -0.30 – 0.03       | 0.02               | -0.13 – 0.15       | 7754   | 0.58  | 0.46 – 0.68    | 4997      | 0.06   | -0.10 – 0.23   |
| WMV                         | -0.13  | -0.27 – 0.01       | 0.01               | -0.14 – 0.15       | 7384.5 | 0.51  | 0.38 – 0.62    | 4687.5    | -0.002 | -0.17 – 0.16   |
| CSFV                        | 0.46   | 0.36 – 0.57        | -0.04              | -0.17 – 0.10       | 7149   | 0.46  | 0.32 – 0.58    | 5897.5    | 0.26   | 0.10 – 0.40    |
| LHCV                        | 0.11   | -0.03 – 0.28       | 0.01               | -0.12 – 0.13       | 6277   | 0.28  | 0.13 – 0.42    | 6373      | 0.36   | 0.21 – 0.49    |
| RHCV                        | 0.07   | -0.07 – 0.22       | 0.04               | -0.09 – 0.16       | 6477   | 0.32  | 0.17 – 0.46    | 6421.5    | 0.37   | 0.22 – 0.50    |
| HCV                         | 0.09   | -0.05 – 0.24       | 0.02               | -0.11 – 0.14       | 6402.5 | 0.31  | 0.15 – 0.44    | 6447      | 0.37   | 0.22 – 0.51    |
| WMHV                        | 0.48   | 0.37 – 0.59        | -0.12              | -0.26 – 0.03       | 5532   | 0.13  | -0.03 – 0.28   | 4942.5    | 0.05   | -0.11 – 0.21   |
| TIV                         | 0.08   | -0.07 – 0.21       | 0.03               | -0.10 – 0.15       | 8556   | 0.74  | 0.66 – 0.81    | 5240      | 0.12   | -0.05 – 0.27   |
| <b>Standardized Volumes</b> |        |                    |                    |                    |        |       |                |           |        |                |
| GMV%                        | -0.29  | -0.42 – -0.16      | 0.03               | -0.12 – 0.18       | 4726   | -0.04 | -0.20 – 0.12   | 4359      | -0.07  | -0.23 – 0.09   |
| WMV%                        | -0.33  | -0.45 – -0.20      | 0.01               | -0.15 – 0.17       | 3368   | -0.31 | -0.45 – -0.16  | 3748      | -0.20  | -0.35 – -0.04  |
| CSFV%                       | 0.52   | 0.41 – 0.62        | -0.05              | -0.20 – 0.09       | 6380   | 0.30  | 0.15 – 0.44    | 5926      | 0.26   | 0.10 – 0.41    |

|                         |       |               |       |              |        |       |              |        |       |               |
|-------------------------|-------|---------------|-------|--------------|--------|-------|--------------|--------|-------|---------------|
| LHCV%                   | 0.11  | -0.03 – 0.24  | 0.04  | -0.10 – 0.17 | 4917.5 | 0.003 | -0.16 – 0.16 | 6271.5 | 0.34  | 0.18 – 0.47   |
| RHCV%                   | 0.08  | -0.07 – 0.23  | 0.06  | -0.08 – 0.18 | 5229.5 | 0.07  | -0.10 – 0.22 | 6318.5 | 0.35  | 0.19 – 0.48   |
| HCV%                    | 0.09  | -0.06 – 0.24  | 0.05  | -0.09 – 0.18 | 5030.5 | 0.03  | -0.14 – 0.19 | 6346.5 | 0.35  | 0.20 – 0.49   |
| WMHV%                   | 0.48  | 0.37 – 0.59   | -0.11 | -0.26 – 0.02 | 5358   | 0.09  | -0.07 – 0.25 | 4904   | 0.04  | -0.12 – 0.21  |
| <b>Cognitive Scores</b> |       |               |       |              |        |       |              |        |       |               |
| KCB Score               | -0.27 | -0.39 – -0.13 | 0.33  | 0.20 – 0.45  | 5642   | 0.15  | -0.01 – 0.30 | 2363   | -0.50 | -0.61 – -0.36 |
| Memory                  | -0.26 | -0.39 – -0.12 | 0.10  | -0.05 – 0.22 | 5512.5 | 0.12  | -0.04 – 0.28 | 3512.5 | -0.25 | -0.40 – -0.09 |
| Executive               | -0.19 | -0.33 – -0.04 | 0.45  | 0.32 – 0.56  | 5604.5 | 0.14  | -0.02 – 0.30 | 2425   | -0.48 | -0.6 – -0.35  |

533  $\rho$  = Spearman's rank correlation coefficient (rho); RC = Rank Biserial Correlation Coefficient.

534 Sex and residence were respectively coded as: Group 1 = Male, Group 2 = Female, and Group 1 = Rural, Group 2 = Urban. A negative RC thus

535 indicates that on average, values for Group 2 were greater than those for Group 1.

536

537 **Table 4: Notable Associations of Volumetry with Cognition and VRFs**

| Volumetry | Factor     | Test                                              | Test statistic | Effect size (RC) | 95% CI        |
|-----------|------------|---------------------------------------------------|----------------|------------------|---------------|
| GMV%      | Illiteracy | MWU <sup>a</sup>                                  | 1909           | -0.23            | -0.43 – 0.002 |
| WMHV%     |            |                                                   | 3448           | 0.40             | 0.19 – 0.57   |
| CSFV%     |            |                                                   | 3416           | 0.39             | 0.18 – 0.56   |
| RHCV%     |            |                                                   | 3040.5         | 0.23             | 0.01 – 0.44   |
| CSFV      |            |                                                   | 3339           | 0.36             | 0.14 – 0.54   |
| WMHV      |            |                                                   | 3458           | 0.40             | 0.20 – 0.58   |
| RHCV      |            |                                                   | 3027.5         | 0.23             | 0.004 – 0.43  |
| LHCV%     | DBP        | Spearman rho                                      | 0.25           |                  | 0.11– 0.38    |
| RHCV%     |            |                                                   | 0.24           |                  | 0.10– 0.39    |
| HCV%      |            |                                                   | 0.25           |                  | 0.11– 0.39    |
| LHCV      |            |                                                   | 0.20           |                  | 0.06– 0.33    |
| RHCV      |            |                                                   | 0.20           |                  | 0.06– 0.34    |
| HCV       |            |                                                   | 0.19           |                  | 0.06– 0.33    |
| LHCV%     | SBP        |                                                   | 0.16           |                  | 0.03– 0.29    |
| WMHV%     | SBP        | Pearson r,<br>controlled for age                  | 0.22           |                  | 0.06– 0.38    |
| WMHV      |            |                                                   | 0.22           |                  | 0.05– 0.38    |
| WMHV%     | PPR        |                                                   | 0.29           |                  | 0.10– 0.46    |
| WMHV      |            |                                                   | 0.30           |                  | 0.11– 0.46    |
| LHCV%     | KCB test 8 | Pearson r,<br>controlled for age<br>and education | 0.17           |                  | 0.04– 0.30    |
| RHCV%     |            |                                                   | 0.21           |                  | 0.09– 0.34    |
| HCV%      |            |                                                   | 0.20           |                  | 0.07– 0.33    |
| LHCV      |            |                                                   | 0.18           |                  | 0.04– 0.32    |

|      |  |  |      |  |            |
|------|--|--|------|--|------------|
| RHCV |  |  | 0.21 |  | 0.08– 0.35 |
| HCV  |  |  | 0.20 |  | 0.06– 0.34 |

538 <sup>a</sup>95% CIs are for effect size (RC)

539

540

541

542

543

544

545

546

547

548

549

550

551

552

553

554

555

556

557

558

559

560

561 **Table 5: Regression analyses**

| Dependent Variable                        | Predictors      | B      | 95% CI <sub>B</sub> |        | Beta  | P value |
|-------------------------------------------|-----------------|--------|---------------------|--------|-------|---------|
|                                           |                 |        | Lower               | Upper  |       |         |
| <b>Predictors of Brain Region Volumes</b> |                 |        |                     |        |       |         |
| GMV                                       | HCV             | 9.64   | 4.31                | 14.97  | 0.24  | <0.001  |
|                                           | Female sex      | -58.46 | -77.90              | -39.01 | -0.40 | <0.001  |
|                                           | WMHV            | -4.85  | -7.08               | -2.62  | -0.29 | <0.001  |
| GMV%                                      | Female sex      | 1.19   | 0.30                | 2.07   | 0.14  | 0.009   |
|                                           | HTN             | 1.58   | 0.50                | 2.66   | 0.15  | 0.004   |
|                                           | Age             | -0.18  | -0.23               | -0.13  | -0.41 | <0.001  |
|                                           | WMHV%           | -2.57  | -3.92               | -1.22  | -0.21 | <0.001  |
|                                           | HCV%            | -8.03  | -11.62              | -4.44  | -0.25 | <0.001  |
|                                           | WMV%            | -0.71  | -0.83               | -0.60  | -0.71 | <0.001  |
| HCV                                       | Education       | 0.15   | 0.07                | 0.23   | 0.28  | <0.001  |
|                                           | GMV             | 0.007  | 0.003               | 0.01   | 0.31  | <0.001  |
|                                           | Urban residence | -1.26  | -1.83               | -0.68  | -0.34 | <0.001  |
| HCV%                                      | Education       | 0.01   | 0.005               | 0.02   | 0.28  | <0.001  |
|                                           | Urban residence | -0.10  | -0.15               | -0.05  | -0.35 | <0.001  |
| WMHV                                      | Age             | 0.13   | 0.05                | 0.21   | 0.28  | 0.002   |
|                                           | HTN             | 2.06   | 0.33                | 3.79   | 0.18  | 0.02    |
|                                           | SBP             | 0.05   | 0.005               | 0.09   | 0.21  | 0.03    |
|                                           | Tobacco         | -3.17  | -6.14               | -0.20  | -0.16 | 0.04    |
|                                           | GMV             | -0.02  | -0.03               | -0.006 | -0.26 | 0.002   |
| WMHV%                                     | Age             | 0.01   | 0.006               | 0.02   | 0.31  | <0.001  |

|                                      |                       |        |        |       |       |        |
|--------------------------------------|-----------------------|--------|--------|-------|-------|--------|
|                                      | Hypertension          | 0.16   | 0.02   | 0.29  | 0.18  | 0.02   |
|                                      | SBP                   | 0.004  | 0.001  | 0.007 | 0.22  | 0.02   |
|                                      | GMV%                  | -0.02  | -0.04  | -0.01 | -0.31 | <0.001 |
|                                      | Tobacco               | -0.27  | -0.51  | -0.03 | -0.17 | 0.03   |
| <b>Predictors of Cognitive Score</b> |                       |        |        |       |       |        |
| KCB score:                           | BMI                   | 0.41   | 0.06   | 0.75  | 0.17  | 0.02   |
| Memory                               | WMHV%                 | -5.04  | -9.70  | -0.39 | -0.19 | 0.03   |
| (Tests 5, 7, 8)                      | 10-year age increment | -3.07  | -5.05  | -1.09 | -0.25 | 0.003  |
| KCB score:                           | HCV%                  | 12.26  | 1.61   | 22.92 | 0.16  | 0.02   |
| Executive                            | Educational level     | 5.01   | 2.69   | 7.33  | 0.32  | <0.001 |
| (Tests 1, 2, 4, 6)                   | Urban residence       | 4.22   | 0.94   | 7.50  | 0.20  | 0.01   |
|                                      | WMHV%                 | -5.31  | -9.78  | -0.85 | -0.19 | 0.02   |
| Total KCB Score                      | Urban residence       | 11.53  | 3.99   | 19.07 | 0.24  | 0.003  |
|                                      | Educational level     | 7.07   | 1.74   | 12.41 | 0.20  | 0.01   |
|                                      | BMI                   | 0.86   | 0.10   | 1.62  | 0.16  | 0.03   |
|                                      | 10-year age increment | -5.90  | -10.27 | -1.53 | -0.20 | 0.008  |
|                                      | WMHV%                 | -11.55 | -21.81 | -1.29 | -0.18 | 0.03   |

562

563

564

565

566

567

568

569

570 **Figures**

571 **Figure 1: Scatterplot Matrix of Grey Matter and White Matter Hyperintensity Volumes**

572 **(Standardized), and Age**

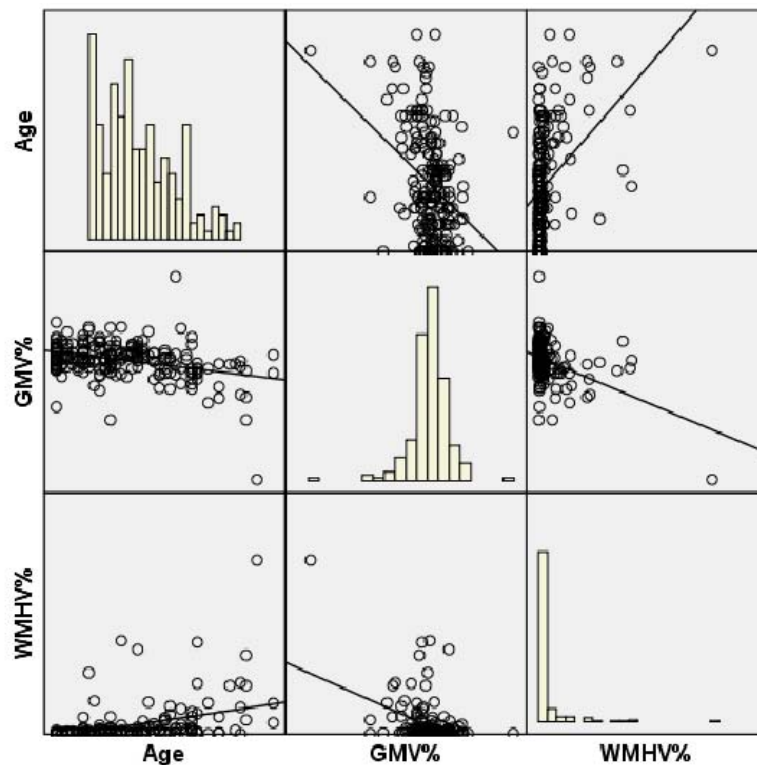

573

574 Diagonal cells show histogram distributions of their respective variables.

575 GMV% = Standardized Grey Matter Volume; WMHV% = Standardized White Matter

576 Hyperintensity Volume

577

578

579

580

581

582

583

584 **Fig 2: Scatterplots of Hippocampal Volumes vs. Years of Education in Literate Participants (n = 170)**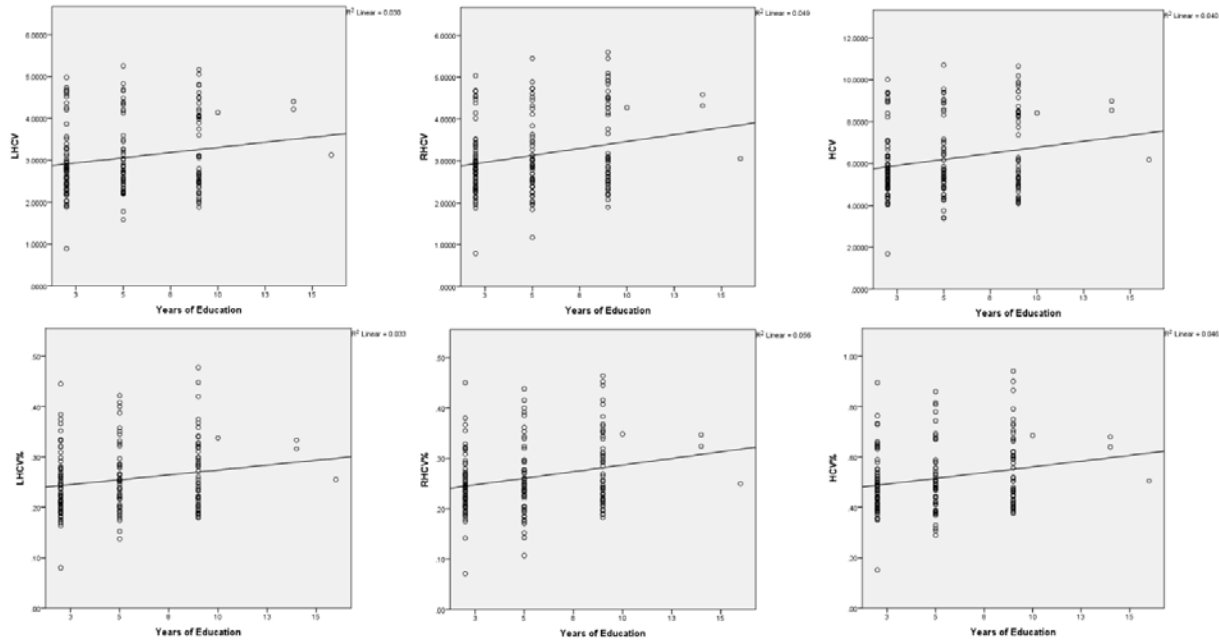

585

586 Results of correlation analyses controlling for age: LHCV:  $r = 0.17$ , 95% CI = 0.007 –0.32; RHCV:  $r = 0.22$ , 95% CI = 0.06 –0.36; HCV:  $r =$   
 587 0.19, 95% CI = 0.04 –0.34; LHCV%:  $r = 0.18$ , 95% CI = 0.05 –0.30; RHCV%:  $r = 0.23$ , 95% CI = 0.10 –0.36; HCV%:  $r = 0.21$ , 95% CI = 0.08 –  
 588 0.34.



589 **Figure 3: Scatterplot Matrix of Standardized Hippocampal Volumes vs. Systolic and Diastolic**  
590 **Blood Pressures**

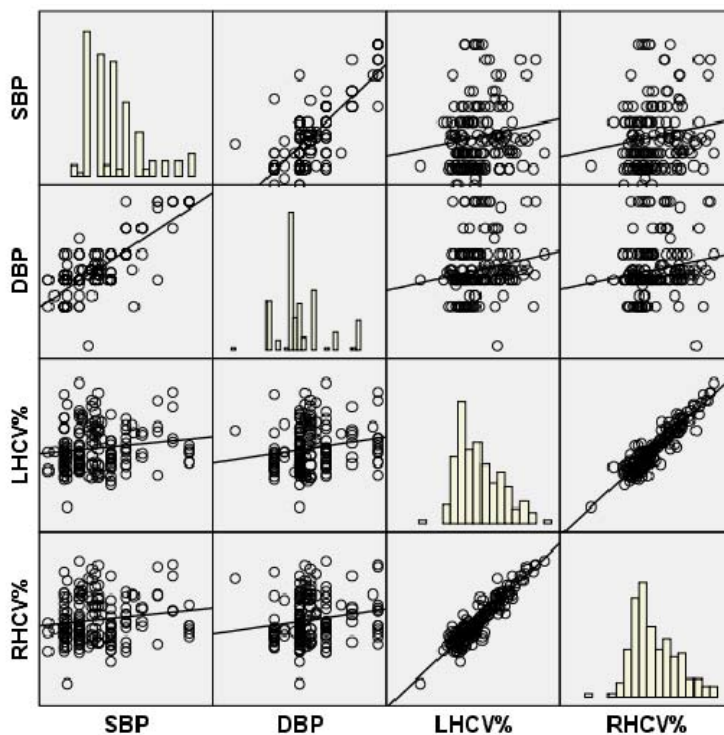

591

592 Blood pressure readings (both systolic and diastolic values) were available for 164 participants.

593 Diagonal cells show histogram distributions of their respective variables.

594 LHCV% = Standardized Left Hippocampal Volume; RHCV% = Standardized Right Hippocampal

595 Volume; SBP = Systolic BP; DBP = Diastolic BP.

596

597

598

599
